# Supplementary material for: Rat Hepatocytes Protect against Lead–Cadmium-Triggered Apoptosis Based on Autophagy Activation
Source: MDPI journal article supplement (doi:10.3390/toxics12040285), 2024-04-12
Supplement: s1 [file s1]

# **Rat Hepatocytes Protect against Lead–Cadmium-Triggered Apoptosis Based on Autophagy Activation**

Junshu Xue<sup>1†</sup>, Huimao Liu<sup>1†</sup>, Tianyi Yin<sup>1†</sup>, Xun Zhou<sup>1</sup>, Xu Song<sup>1</sup>, Yuanfeng Zou<sup>1</sup>, Lixia Li<sup>1</sup>, Renyong Jia<sup>2</sup>, Yuping Fu<sup>1</sup>, Xinghong Zhao<sup>1</sup>, Zhongqiong Yin<sup>1\*</sup>

<sup>1</sup> Natural Medicine Research Center, College of Veterinary Medicine, Sichuan Agricultural University, Chengdu, 611130, China

<sup>2</sup> Key Laboratory of Animal Disease and Human Health of Sichuan Province, Sichuan Agricultural University, Chengdu, 611130, China

\* Corresponding author. E-mail: yinzhongq@163.com

† These authors contributed equally to this work

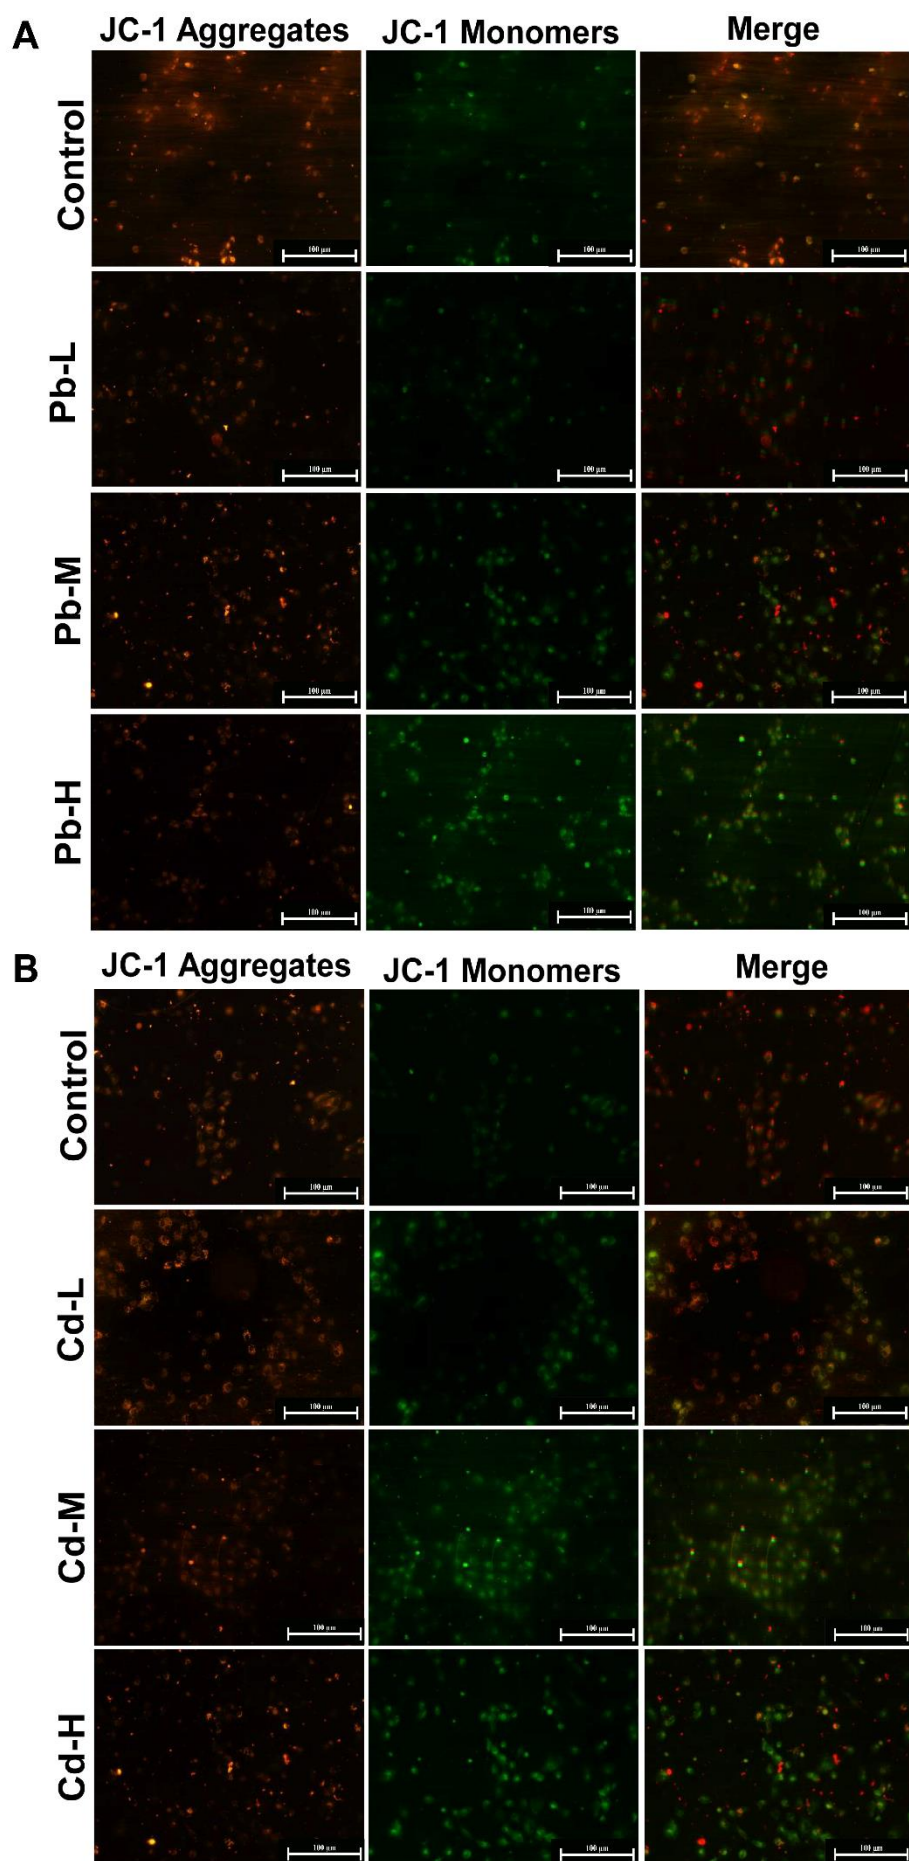

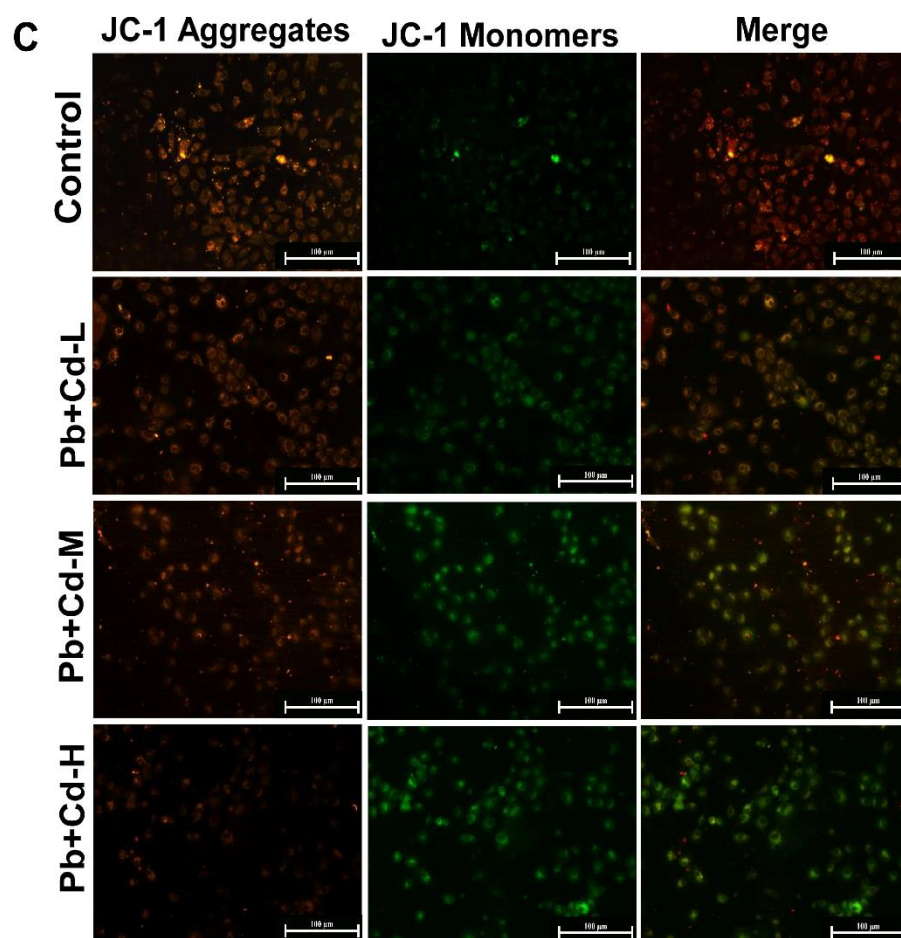

**Figure S1.** Effects of Pb and Cd on MMP level in BRL-3A cells. (A–C) The MMP expression level of the BRL-3A cells after Pb and Cd exposure (scale bar = 100  $\mu$ m). Decrease in MMP indicated by the shift from red to green fluorescence of JC-1.
